# Supplementary material for: Single-cell and bulk sequencing analyses reveal the immune suppressive role of PTPN6 in glioblastoma
Source: Aging (Albany NY). 2023 Sep 21;15(18):9822–41. doi: 10.18632/aging.205052 (PMC10564408; doi:10.18632/aging.205052)
Supplement: Supplementary Figures [file aging-15-205052-s001.pdf]

SUPPLEMENTARY FIGURES

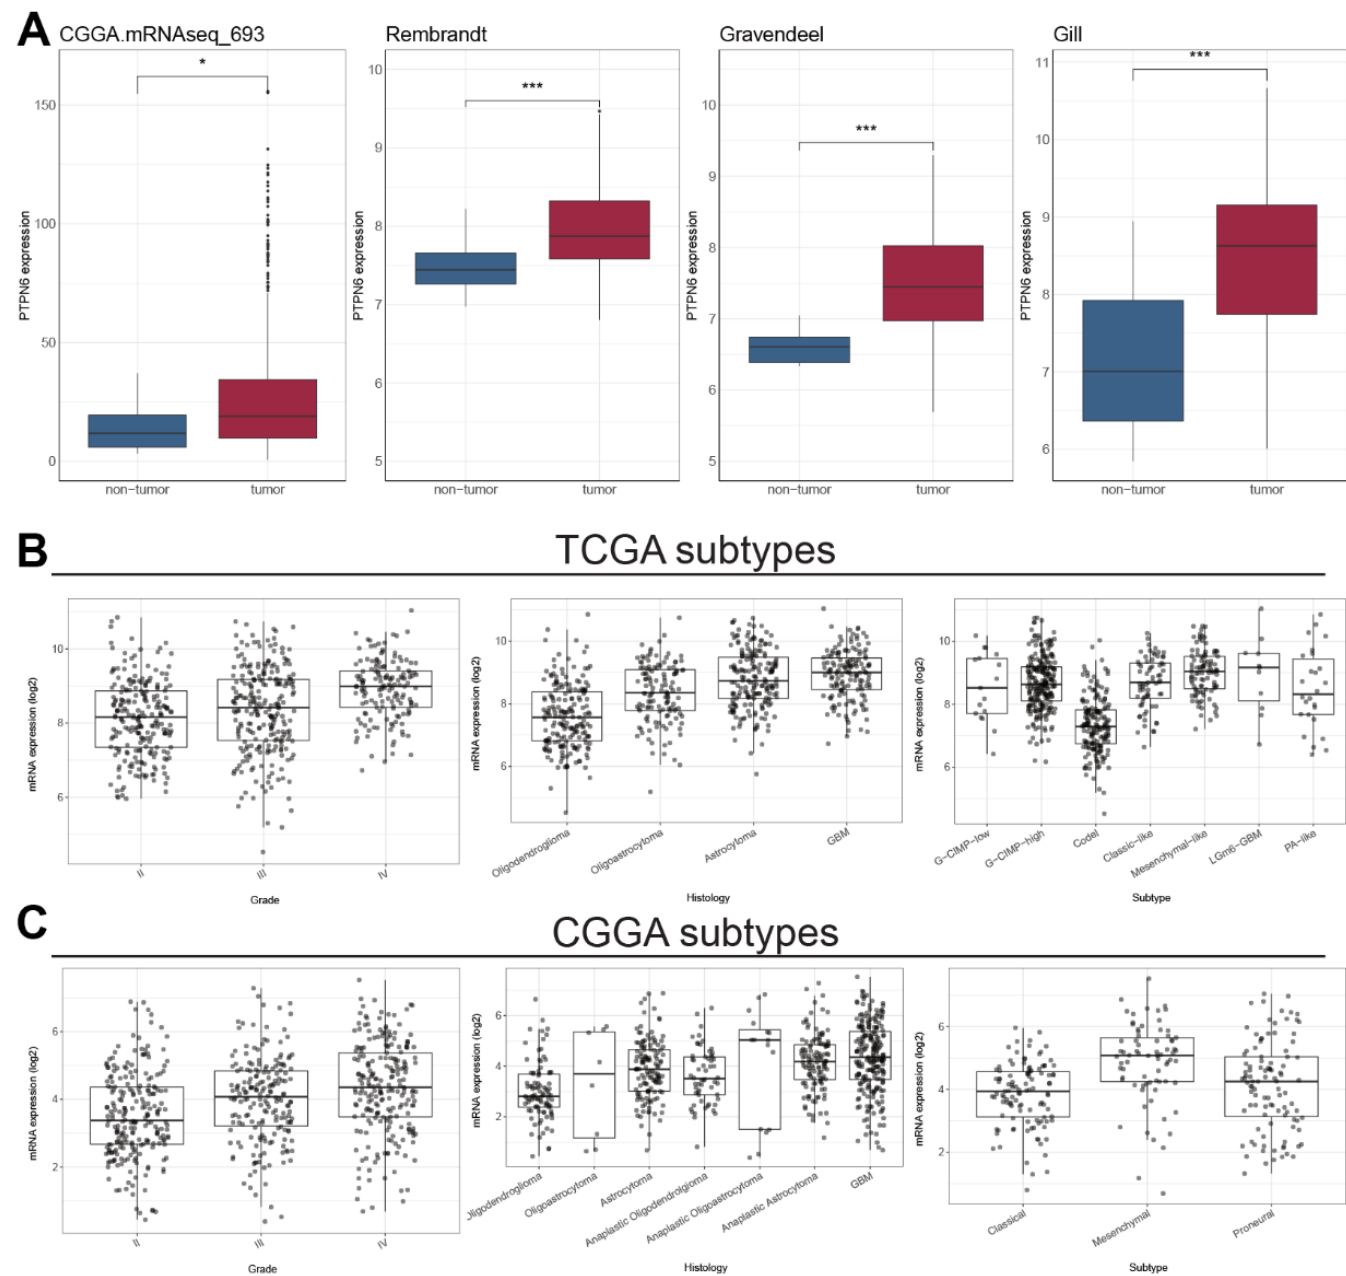

**Supplementary Figure 1. Expression pattern of PTPN6 in GBM.** (A) Distribution of PTPN6 expression from four different datasets. (B) Distribution of PTPN6 expression in TCGA subtypes. (C) Distribution of PTPN6 expression in CGGA subtypes.

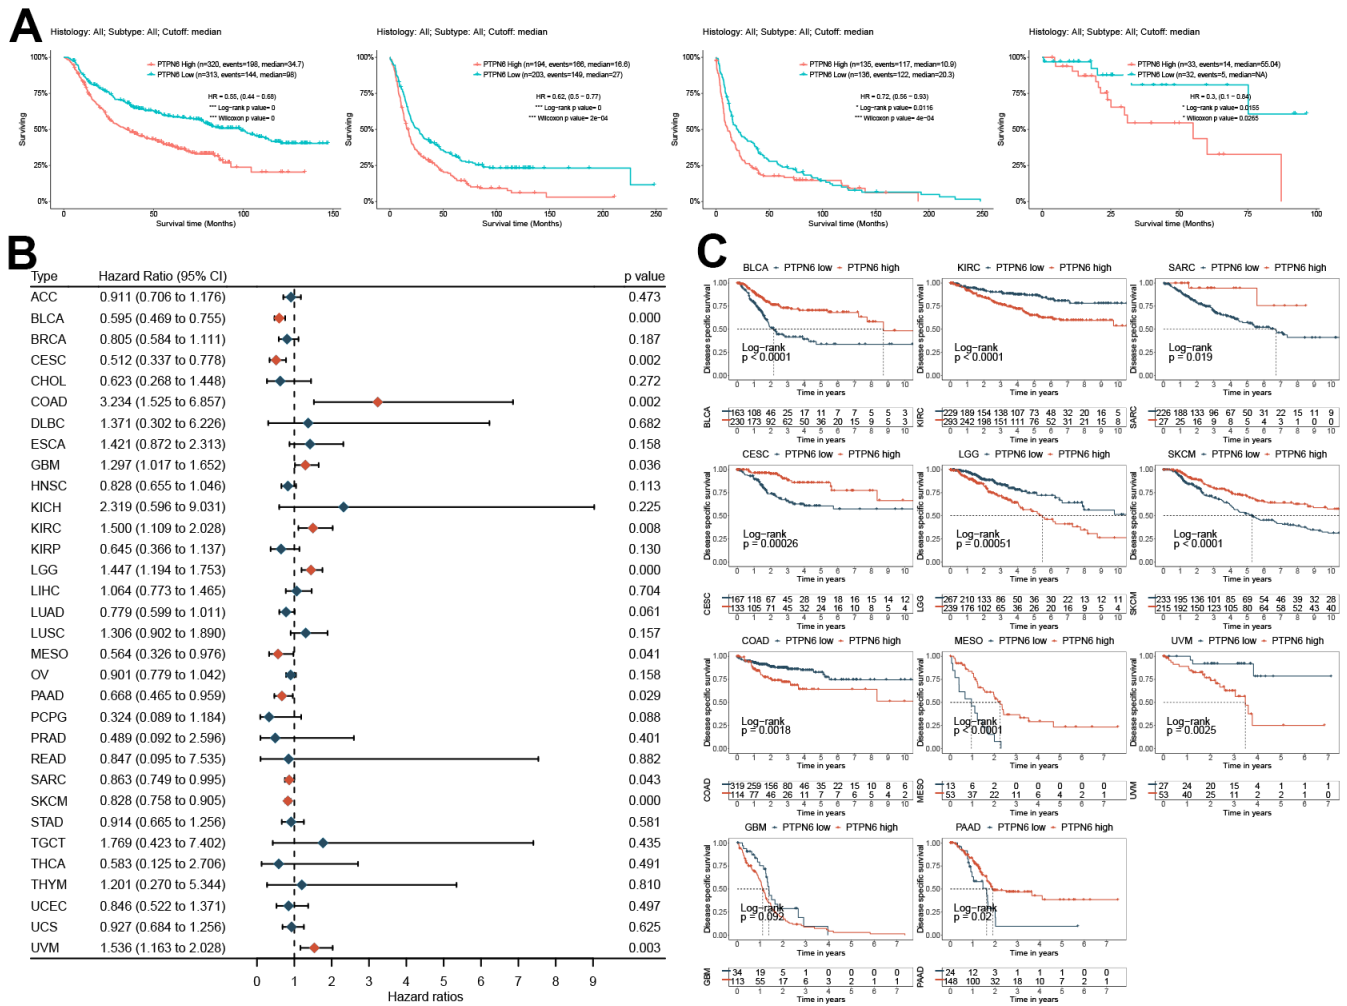

**Supplementary Figure 2. Prognostic analysis of PTPN6 for disease-specific survival in pan-cancers. (A)** Clinical prognosis of PTPN6 in four different datasets. **(B)** Clinical significance of PTPN6 for disease specific survival in the TCGA dataset. **(C)** Representative survival analysis of PTPN6 in TCGA datasets.

0

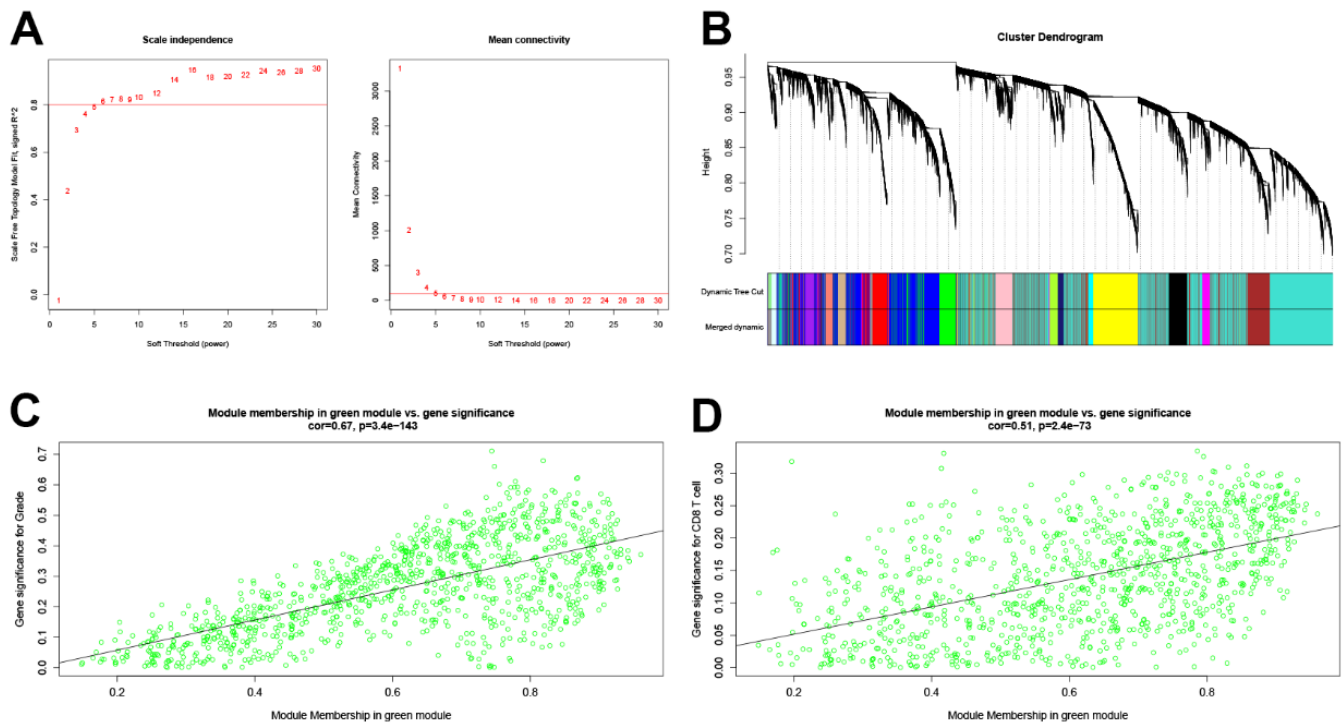

**Supplementary Figure 3. WGCNA construction and functional annotation.** (A) Power distribution of WGCNA. (B) Dynamic tree of 18 modules. (C, D) Module membership and gene importance.

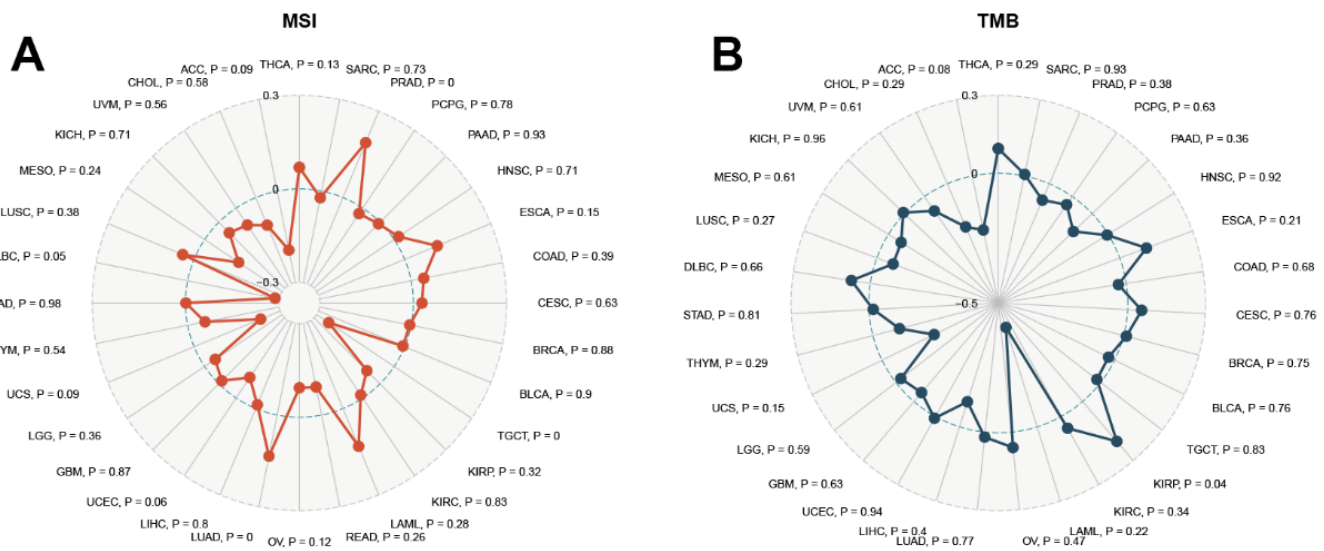

**Supplementary Figure 4. Correlations between PTPN6 and TMB, MSI in pan-cancers.** (A) MSI of PTPN6 for TCGA datasets. (B) TMB of PTPN6 for TCGA datasets.

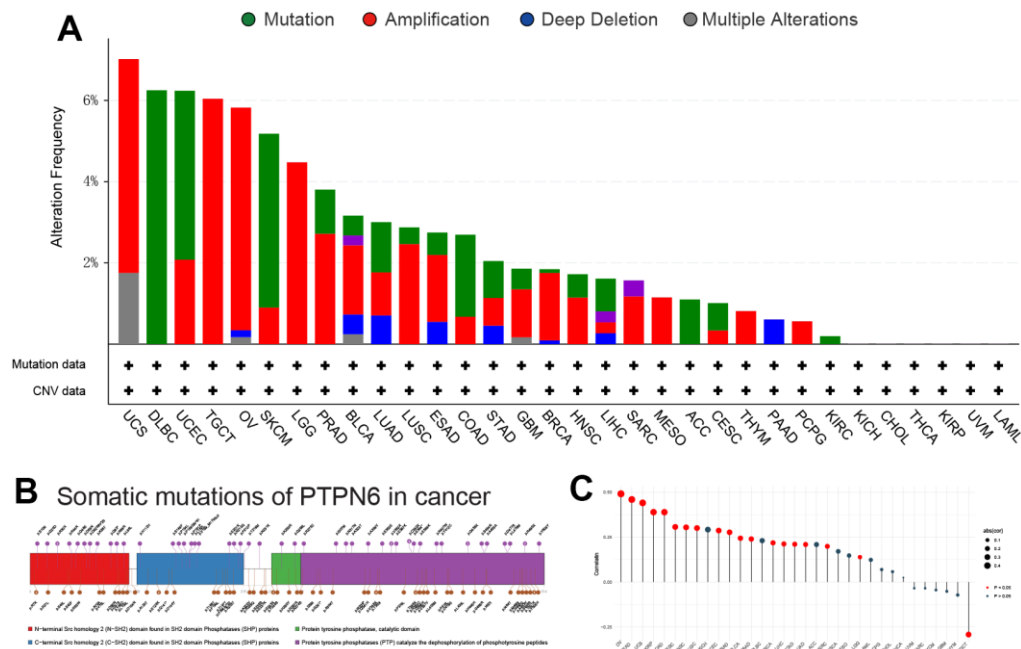

**Supplementary Figure 5. Genetic alterations of PTPN6 in pan-cancers. (A)** Mutational frequency of PTPN6 in TCGA datasets. **(B)** Somatic mutations of PTPN6 in cancer. **(C)** CNV of PTPN6.

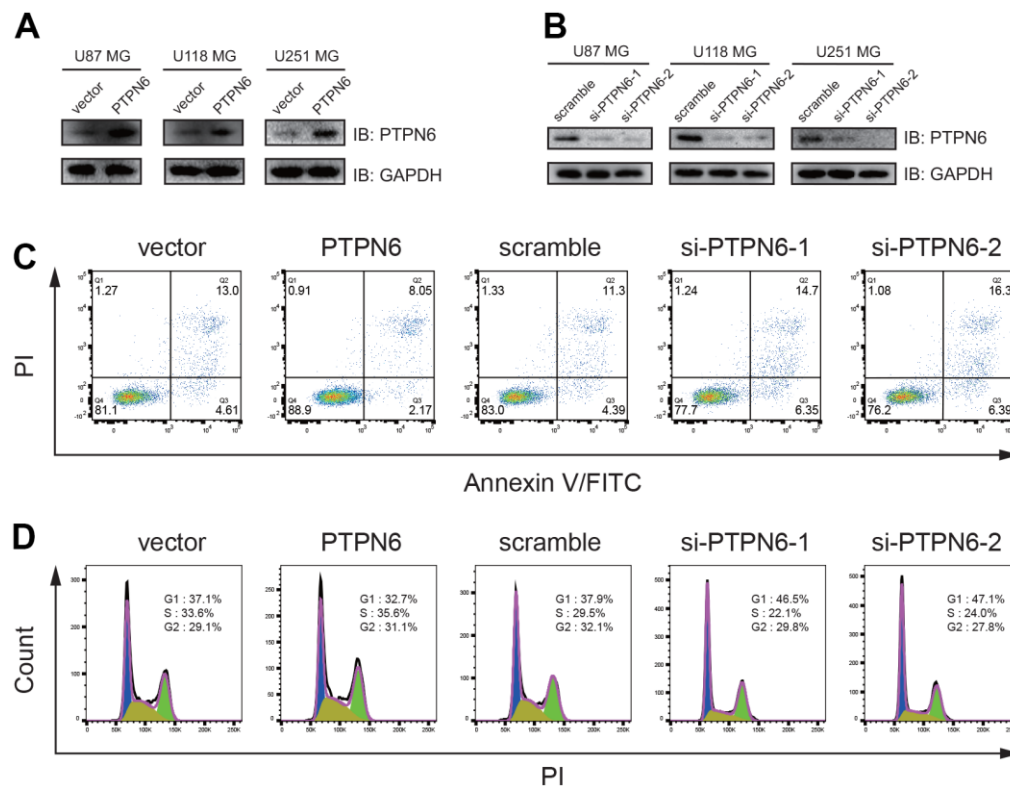

**Supplementary Figure 6. PTPN6 regulated cell cycle and apoptosis in glioma cells. (A)** PTPN6 was transduced in glioma cell lines. **(B)** PTPN6 was knockdown in glioma cell lines. **(C)** Flow cytometric analysis of early and late apoptotic cells with annexin V and propidium iodide (PI). **(D)** The effect of PTPN6 on cell cycle distribution.
